# Supplementary material for: Health-related quality of life in patients receiving medicinal cannabis: systematic review and meta-analysis of primary research findings 2015–2025
Source: Springer Nature journal article supplement (doi:10.1007/s11136-026-04170-7), 2026-02-01
Supplement: MOESM3 [file 11136_2026_4170_MOESM3_ESM.pdf]

## Health-related quality of life in patients receiving medicinal cannabis: Systematic review and meta-analysis of primary research findings 2015 – 2025

Quality of Life Research

\*Margaret-Ann Tait,<sup>1,2,3</sup> Louise Acret,<sup>1,2,3</sup> Daniel SJ Costa,\* Kate White,<sup>1,2,3</sup> Rachel Campbell,<sup>4</sup> Claudia Rutherford<sup>1,2,3</sup>

<sup>1</sup>Susan Wakil School of Nursing, Faculty of Medicine and Health, University of Sydney, NSW, Australia

<sup>2</sup>Sydney Local Health District, NSW, Australia

<sup>3</sup>The Daffodil Centre, The University of Sydney, and Cancer Council NSW

<sup>4</sup>School of Psychology, Faculty of Science, University of Sydney, NSW, Australia

\* [margaret-ann.tait@sydney.edu.au](mailto:margaret-ann.tait@sydney.edu.au)

### Online Resource 3. Overview of 64 included studies (ordered by year of publication)

| 1 <sup>st</sup> Author, year    | Country        | Title                                                                                                                                                                                                                                                        | Study Aims                                                                                                                                                                                                               | Journal                                             |
|---------------------------------|----------------|--------------------------------------------------------------------------------------------------------------------------------------------------------------------------------------------------------------------------------------------------------------|--------------------------------------------------------------------------------------------------------------------------------------------------------------------------------------------------------------------------|-----------------------------------------------------|
| Dickinson et al., et al., 2025  | United Kingdom | UK Medical Cannabis Registry: An Analysis of Outcomes of Medical Cannabis Therapy for Hypermobility-Associated Chronic Pain                                                                                                                                  | To evaluate clinical outcomes in patients with hypermobility spectrum disorder and hypermobile Ehlers-Danlos syndrome with chronic pain following MC treatment.                                                          | ACR Open Rheumatology                               |
| Varadpande et al., et al., 2025 | United Kingdom | UK Medical Cannabis Registry: An Analysis of Clinical Outcomes of Medicinal Cannabis Therapy for Cancer Pain                                                                                                                                                 | To evaluate the change in PROMs of patients enrolled in the UKMCR prescribed MC for chronic pain management.                                                                                                             | Journal of Pain and Palliative Care Pharmacotherapy |
| Datta et al., et al., 2025      | United Kingdom | UK medical cannabis registry: A clinical outcome analysis of medical cannabis therapy in chronic pain patients with and without co-morbid sleep impairment                                                                                                   | To assess PROMs following MC treatment in Chronic Pain patients with and without co-morbid sleep impairment.                                                                                                             | Pain Practice                                       |
| Tait M, et al., 2025            | Australia      | Improvements in health-related quality of life are maintained long-term in patients prescribed medicinal cannabis in Australia: The QUEST Initiative 12-month follow-up observational study.                                                                 | To assess 12-month follow-up data to determine if our previously reported improvements at 3-months were maintained long-term and to explore differences across health conditions and MC compositions.                    | PloS one                                            |
| Francis et al., 2024            | United Kingdom | Assessment of Clinical Outcomes in Patients With Osteoarthritis: Analysis from the UK Medical Cannabis Registry                                                                                                                                              | To evaluate pain-specific and general HRQL changes in patients with osteoarthritis using patient-reported outcome measures.                                                                                              | Journal of Pain and Palliative Care Pharmacotherapy |
| Gupta et al., 2024              | United Kingdom | UK medical cannabis registry: an updated analysis of clinical outcomes of cannabis-based medicinal products for inflammatory bowel disease                                                                                                                   | To evaluate differences in PROMs for patients prescribed MC for IBD over an 18-month period using data collected from the UKMCR.                                                                                         | Expert Review of Gastroenterology and Hepatology    |
| Sultan et al., 2024             | United Kingdom | Controlled Inhalation of Tetrahydrocannabinol-Predominant Cannabis Flos Mitigates Severity of Post-Traumatic Stress Disorder Symptoms and Improves Quality of Sleep and General Mood in Cannabis-Experienced UK Civilians: A Real-World, Observational Study | To investigate the safety and effectiveness of THC-predominant cannabis flowers for inhalation to manage PTSD symptoms in a real-world setting.                                                                          | Medical Cannabis and Cannabinoids                   |
| Stienrut et al., 2024           | Thailand       | Medical Cannabis Prescription Practices and Quality of Life in Thai Patients: A Nationwide Prospective Observational Cohort Study                                                                                                                            | To explore the prescribing patterns of traditional practitioners and assess the impact of cannabis oil on patients' quality of life, with a specific focus on comparing outcomes between cancer and non-cancer patients. | Medical Cannabis and Cannabinoids                   |

| <b>1<sup>st</sup> Author, year</b> | <b>Country</b> | <b>Title</b>                                                                                                                                                            | <b>Study Aims</b>                                                                                                                                                                                                                                                                                                             | <b>Journal</b>                                      |
|------------------------------------|----------------|-------------------------------------------------------------------------------------------------------------------------------------------------------------------------|-------------------------------------------------------------------------------------------------------------------------------------------------------------------------------------------------------------------------------------------------------------------------------------------------------------------------------|-----------------------------------------------------|
| Warner-Levy et al., 2024           | United Kingdom | UK Medical Cannabis Registry: a cohort study of patients prescribed cannabis-based oils and dried flower for generalised anxiety disorder                               | To investigate real-world outcomes and safety of different MC formulations in GAD patients.                                                                                                                                                                                                                                   | Expert Review of Neurotherapeutics                  |
| Lamonarca et al., 2024             | Argentina      | Psychiatric comorbidities before and after cannabidiol treatment in adult patients with drug resistant focal epilepsy                                                   | To evaluate, in the same patient population that was part of a previous observational study, depression, quality of life, anxious symptoms and daytime sleepiness before and after CBD treatment.                                                                                                                             | Epilepsy and Behavior                               |
| Li et al., 2024                    | United Kingdom | UK Medical Cannabis Registry: a case series analyzing clinical outcomes of medical cannabis therapy for generalized anxiety disorder patients                           | To analyze key changes in anxiety-specific and general HRQL outcomes and safety in patients with GAD prescribed a homogenous selection of MCs, to reduce the associated biases that otherwise affect UK Medical Cannabis Registry data.                                                                                       | International Clinical Psychopharmacology           |
| Barre et al., 2024                 | France         | Limited Impact of Cannabidiol on Health-related Quality of Life of People with Long-term Controlled HIV: A Double-blind, Randomized, Controlled Trial                   | To test whether oral CBD-rich medication could significantly improve people with HIV's HRQL.                                                                                                                                                                                                                                  | Open Forum Infectious Diseases                      |
| Lent et al., 2024                  | United States  | Changes in health-related quality of life over the first three months of medical marijuana use                                                                          | To evaluate changes in eight domains of HRQL over the first three months of medical marijuana treatment.                                                                                                                                                                                                                      | Journal of Cannabis Research                        |
| Dujic et al., 2024                 | Croatia        | Chronic Cannabidiol Administration Mitigates Excessive Daytime Sleepiness and Fatigue in Patients with Primary Hypertension: Insights from a Randomized Crossover Trial | To establish whether chronic CBD supplementation will improve self-reported outcomes related to quality of life.                                                                                                                                                                                                              | Cannabis and Cannabinoid Research                   |
| Sridharan et al., 2024             | United Kingdom | Comparison of Cannabis-Based Medicinal Product Formulations for Fibromyalgia: A Cohort Study                                                                            | To analyze changes in general health-related quality of life (HRQoL) and fibromyalgia symptom severity assessed by PROMs.                                                                                                                                                                                                     | Journal of Pain and Palliative Care Pharmacotherapy |
| Haupts et al., 2024                | Germany        | Patient-reported benefits from nabiximols treatment in multiple sclerosis-related spasticity exceed conventional measures                                               | To investigate the effectiveness of nabiximols in a real-world setting for the treatment of MS spasticity using GAS as a primary measure of treatment success.                                                                                                                                                                | Neurodegenerative Disease Management                |
| Lynskey et al., 2024               | United Kingdom | Prescribed Medical Cannabis Use Among Older Individuals: Patient Characteristics and Improvements in Well-Being: Findings from T21                                      | To describe the characteristics of older individuals (aged 65 years or older) seeking MCs in the UK, examine 3-month changes in measures of well-being (general health, quality of life, mood/depression and sleep) in this group and compare their characteristics and treatment outcomes with those in younger individuals. | Drugs and Aging                                     |
| Brett et al., 2024                 | United States  | An observational time-series study on the behavioral effects of adjunctive artisanal cannabidiol use by adults with treatment resistant epilepsies                      | To determine if independent adjunctive use of artisanal CBD was beneficial for adults with treatment resistant epilepsies.                                                                                                                                                                                                    | BMC Neurology                                       |
| Murphy et al., 2024                | United Kingdom | Clinical outcome analysis of patients with multiple sclerosis - Analysis from the UK Medical Cannabis Registry                                                          | To assess changes in MS-specific and general HRQL outcomes alongside adverse event incidence in patients prescribed MCs for MS from the UK.                                                                                                                                                                                   | Multiple Sclerosis and Related Disorders            |
| Vivek et al., 2024                 | United Kingdom | UK Medical Cannabis Registry: Assessment of clinical outcomes in patients with insomnia                                                                                 | To assess changes in sleep-specific HRQL for those prescribed cannabis-based medicinal products for insomnia.                                                                                                                                                                                                                 | Brain and Behavior                                  |
| Murphy et al., 2024                | United Kingdom | A cohort study comparing the effects of medical cannabis for anxiety patients with and without comorbid sleep disturbance                                               | To compare the PROMs of patients prescribed MCs for GAD, with and without impaired sleep                                                                                                                                                                                                                                      | Neuropsychopharmacology Reports                     |

| <b>1<sup>st</sup> Author, year</b> | <b>Country</b> | <b>Title</b>                                                                                                                                                          | <b>Study Aims</b>                                                                                                                                                                                                                                                                                                                                                                     | <b>Journal</b>                                    |
|------------------------------------|----------------|-----------------------------------------------------------------------------------------------------------------------------------------------------------------------|---------------------------------------------------------------------------------------------------------------------------------------------------------------------------------------------------------------------------------------------------------------------------------------------------------------------------------------------------------------------------------------|---------------------------------------------------|
| Aiewtrakoon et al., 2024           | Thailand       | Efficacy and Safety of Cannabidiol Oil on Chronic Insomnia: The First Randomized, Double-Blind, Placebo-Controlled, Crossover, Pilot Study in Thailand                | To investigate the impact of a continuous four-week sublingual CBD intake on sleep indicators.                                                                                                                                                                                                                                                                                        | Journal of the Medical Association of Thailand    |
| Kelley et al., 2024                | United States  | Observational Analysis of the Influence of Medical Marijuana Use on Quality of Life in Patients                                                                       | To identify a potential relationship between cannabis use and quality of life measures including physical and emotional limitations, energy and fatigue, pain, and physical and social functioning.                                                                                                                                                                                   | Medical Cannabis and Cannabinoids                 |
| Francis et al., 2024               | United Kingdom | Assessment of clinical outcomes in patients with inflammatory arthritis: Analysis from the UK Medical Cannabis Registry                                               | To assess changes in validated PROMs after initiation of cannabis-based medicinal products and the safety of MC in patients with inflammatory arthritis.                                                                                                                                                                                                                              | International Clinical Psychopharmacology         |
| Hershkovich et al., 2023           | Israel         | The role of cannabis in treatment-resistant fibromyalgia women.                                                                                                       | To use the World Health Organization Quality of Life Bref questionnaire to characterize the impact of Cannabis Treatment initiation on the quality of life in women suffering from treatment-resistant fibromyalgia.                                                                                                                                                                  | Pain practice                                     |
| Vigano et al., 2023                | Canada         | The Quebec Cannabis Registry: Investigating the Safety and Effectiveness of Medical Cannabis.                                                                         | To investigate the safety and effectiveness of medical cannabis in the real-world clinical practice setting.                                                                                                                                                                                                                                                                          | Cannabis and cannabinoid research                 |
| Tait M, et al., 2023               | Australia      | Health-related quality of life in patients accessing medicinal cannabis in Australia: The QUEST initiative results of a 3-month follow-up observational study.        | To assess overall HRQL, pain, fatigue, sleep, anxiety, and depression in a large real-world sample of patients accessing prescribed medicinal cannabis.                                                                                                                                                                                                                               | PloS one                                          |
| Ergisi et al., 2023                | United Kingdom | An Updated Analysis of Clinical Outcome Measures Across Patients From the UK Medical Cannabis Registry.                                                               | To analyze safety and the change in HRQL outcomes for all patients enrolled in the UKMCR who were prescribed MCs. Supplementary aims included evaluation of dosage regimens.                                                                                                                                                                                                          | Cannabis and cannabinoid research                 |
| Arkell et al., 2023                | Australia      | Assessment of Medical Cannabis and Health-Related Quality of Life.                                                                                                    | To assess whether patients using medical cannabis report improvements in health-related quality of life over time.                                                                                                                                                                                                                                                                    | JAMA network open                                 |
| Nathan et al., 2023                | United States  | Assessing Efficacy and Use Patterns of Medical Cannabis for Symptom Management in Elderly Cancer Patients.                                                            | To evaluate the effect of MC on the symptoms of this patient population. Secondary outcome measures include summary data on medical cannabis formulations and ratios used.                                                                                                                                                                                                            | The American journal of hospice & palliative care |
| Hardy et al., 2023                 | Australia      | Phase IIb Randomized, Placebo-Controlled, Dose-Escalating, Double-Blind Study of Cannabidiol Oil for the Relief of Symptoms in Advanced Cancer (MedCan1-CBD).         | To assess whether CBD oil, when used in conjunction with standard palliative care, reduced symptom burden in patients with advanced cancer.                                                                                                                                                                                                                                           | Journal of clinical oncology                      |
| Rifkin-Zybutz et al., 2023         | United Kingdom | Clinical outcome data of anxiety patients treated with cannabis-based medicinal products in the United Kingdom: A cohort study from the UK medical cannabis registry. | To assess changes in anxiety symptoms as measured by the GAD-7 and the incidence of adverse events as collected by self-report form. The effect of type of MC product or previous cannabis experience influenced GAD-7 scores or the reporting of an adverse event was also analysed. The secondary aim was to investigate sleep quality and health-related quality of life outcomes. | Psychopharmacology                                |
| Tait J, et al., 2023               | United Kingdom | Clinical outcome data of chronic pain patients treated with cannabis-based oils and dried flower from the UK Medical Cannabis Registry.                               | To evaluate changes in general HRQL, chronic pain-specific outcomes, and adverse events in patients treated exclusively with Cannabis-based medicinal products.                                                                                                                                                                                                                       | Expert Review of Neurotherapeutics                |

| <b>1<sup>st</sup> Author, year</b> | <b>Country</b> | <b>Title</b>                                                                                                                                                                     | <b>Study Aims</b>                                                                                                                                                                                                                                                                                                                                                                                          | <b>Journal</b>                                 |
|------------------------------------|----------------|----------------------------------------------------------------------------------------------------------------------------------------------------------------------------------|------------------------------------------------------------------------------------------------------------------------------------------------------------------------------------------------------------------------------------------------------------------------------------------------------------------------------------------------------------------------------------------------------------|------------------------------------------------|
| Bapir et al., 2023                 | United Kingdom | Comparing the effects of medical cannabis for chronic pain patients with and without co-morbid anxiety: A cohort study.                                                          | To compare the outcomes of chronic pain patients with and without co-morbid anxiety following MC treatment.                                                                                                                                                                                                                                                                                                | Expert Review of Neurotherapeutics             |
| Nicholas et al., 2023              | United Kingdom | UK medical cannabis registry: Assessment of clinical outcomes in patients with headache disorders.                                                                               | To assess changes in validated PROMs.                                                                                                                                                                                                                                                                                                                                                                      | Expert Review of Neurotherapeutics             |
| Vickery et al., 2022               | Australia      | A large Australian longitudinal cohort registry demonstrates sustained safety and efficacy of oral medicinal cannabis for at least two years.                                    | To analyse collected Patient MC dose, safety and validated outcome data.                                                                                                                                                                                                                                                                                                                                   | PloS one                                       |
| Aungsumart et al., 2021            | Thailand       | A pilot study of the government pharmaceutical organization (GPO) cannabis extract for multiple sclerosis (MS) spasticity treatment in Thailand                                  | To evaluate the efficacy and safety of Government Pharmaceutical Organization cannabis extract in the treatment of spasticity in MS patients in Thailand.                                                                                                                                                                                                                                                  | Journal of the Medical Association of Thailand |
| Eibach et al., 2021                | Germany        | Cannabidivarin for HIV-Associated Neuropathic Pain: A Randomized, Blinded, Controlled Clinical Trial                                                                             | To investigate cannabidivarin (CBDV) a novel phytocannabinoid derived from the Cannabis sativa L. plant, in patients with HIV-associated neuropathic pain.                                                                                                                                                                                                                                                 | Clinical Pharmacology & Therapeutics           |
| Erridge et al., 2021               | United Kingdom | An initial analysis of the UK Medical Cannabis Registry: Outcomes analysis of first 129 patients                                                                                 | To analyze the early outcomes of the first series of patients prescribed MCs in the UK with respect to effects on HRQL and clinical safety.                                                                                                                                                                                                                                                                | Neuropsychopharmacology Reports                |
| Gruber et al., 2021                | United States  | No pain, all gain? Interim analyses from a longitudinal, observational study examining the impact of medical cannabis treatment on chronic pain and related symptoms             | To examine patients using MC to treat chronic pain pre versus post MC treatment.                                                                                                                                                                                                                                                                                                                           | Experimental and Clinical Psychopharmacology   |
| Kawka et al., 2021                 | United Kingdom | Clinical Outcome Data of First Cohort of Chronic Pain Patients Treated With Cannabis-Based Sublingual Oils in the United Kingdom: Analysis From the UK Medical Cannabis Registry | To investigate the HRQL outcomes of patients with chronic pain who were prescribed MC oil preparations.                                                                                                                                                                                                                                                                                                    | Journal of Clinical Pharmacology               |
| Lucas et al., 2021                 | Canada         | Cannabis Significantly Reduces the Use of Prescription Opioids and Improves Quality of Life in Authorized Patients: Results of a Large Prospective Study                         | To identify the primary characteristics of a large national cohort of medical cannabis patients in Canada, including detailed patterns of cannabis use; to assess the impacts of regulated, physician-supervised MC access on prescription substance use and quality of life; and to analyze key variables potentially associated with changes in prescription drug use and quality of life over 6 months. | Pain Medicine                                  |
| Meng et al., 2021                  | Canada         | Patient-reported outcomes in those consuming medical cannabis: a prospective longitudinal observational study in chronic pain patients                                           | To assess the impact of cannabis on pain intensity and pain-related interference for patients consuming cannabis for up to 12 months. Secondary aims were to identify associated changes in opioid consumption, mental health, quality of life, and general health symptoms.                                                                                                                               | Canadian Journal of Anesthesia                 |
| Naftali et al., 2021               | Israel         | Cannabis is associated with clinical but not endoscopic remission in ulcerative colitis: A randomized controlled trial                                                           | To assess the effect of cannabis in improving clinical and inflammatory outcomes in ulcerative colitis patients.                                                                                                                                                                                                                                                                                           | PLoS ONE                                       |
| Peterson et al., 2021              | United States  | Measuring the Change in Health-Related Quality of Life in Patients Using Marijuana for Pain Relief                                                                               | To determine if there is a relationship between HRQL and MC use in patients using it to relieve pain.                                                                                                                                                                                                                                                                                                      | Medical Cannabis and Cannabinoids              |

| <b>1<sup>st</sup> Author, year</b> | <b>Country</b> | <b>Title</b>                                                                                                                                                                                             | <b>Study Aims</b>                                                                                                                                                                                                                                                                                                                                                                                                                                                                                                                                   | <b>Journal</b>                             |
|------------------------------------|----------------|----------------------------------------------------------------------------------------------------------------------------------------------------------------------------------------------------------|-----------------------------------------------------------------------------------------------------------------------------------------------------------------------------------------------------------------------------------------------------------------------------------------------------------------------------------------------------------------------------------------------------------------------------------------------------------------------------------------------------------------------------------------------------|--------------------------------------------|
| Schloss et al., 2021               | Australia      | A Phase et al., 2 Randomised Clinical Trial Assessing the Tolerability of Two Different Ratios of Medicinal Cannabis in Patients With High Grade Gliomas                                                 | To investigate the tolerability of two different ratios of oral medicinal cannabis oil in patients who have been diagnosed with high grade gliomas as an adjunct to standard treatment.                                                                                                                                                                                                                                                                                                                                                             | Frontiers in Oncology                      |
| Naftali et al., 2021               | Israel         | Oral CBD-rich Cannabis Induces Clinical but Not Endoscopic Response in Patients with Crohn's Disease, a Randomised Controlled Trial                                                                      | To evaluate efficacy of oral use of cannabis oil rich in CBD for induction of clinical, laboratory, and endoscopic remission in mild-to-moderate Crohn's disease.                                                                                                                                                                                                                                                                                                                                                                                   | Journal of Crohn's & colitis               |
| Capano et al., 2020                | United States  | Evaluation of the effects of CBD hemp extract on opioid use and quality of life indicators in chronic pain patients: a prospective cohort study                                                          | To investigate the impact of full hemp extract cannabidiol (CBD) on opioid use and quality of life indicators among chronic pain patients.                                                                                                                                                                                                                                                                                                                                                                                                          | Postgraduate Medicine                      |
| Chaves et al., 2020                | Brazil         | Ingestion of a THC-Rich Cannabis Oil in People with Fibromyalgia: A Randomized, Double-Blind, Placebo-Controlled Clinical Trial                                                                          | To determine the benefit of a tetrahydrocannabinol (THC)-rich cannabis oil on symptoms and quality of life of fibromyalgia patients.                                                                                                                                                                                                                                                                                                                                                                                                                | Pain Medicine                              |
| Gulbransen et al., 2020            | New Zealand    | Cannabidiol prescription in clinical practice: An audit on the first 400 patients in New Zealand                                                                                                         | To review the changes in self-reported quality of life measurements, drug tolerability, and dose-dependent relationships in patients prescribed CBD oil for various conditions at a single institution.                                                                                                                                                                                                                                                                                                                                             | BJGP Open                                  |
| Safakish et al., 2020              | Canada         | Medical cannabis for the management of pain and quality of life in chronic pain patients: A prospective observational study                                                                              | To evaluate the short-, and long-term effects of plant-based MC on outcomes of interest related to pain, quality of life, tolerability, and opioid medication use in a large cohort of chronic pain patients using medical cannabis over the course of one year.                                                                                                                                                                                                                                                                                    | Pain Medicine                              |
| Bar-Sela et al., 2019              | Israel         | Cannabis-related cognitive impairment: a prospective evaluation of possible influences on patients with cancer during chemotherapy treatment as a pilot study                                            | To evaluate the effect of cannabis consumption on cognitive abilities as well as on symptom relief in patients with cancer during chemotherapy treatment.                                                                                                                                                                                                                                                                                                                                                                                           | Anti-Cancer Drugs                          |
| Gaston et al., 2019                | United States  | Quality of life in adults enrolled in an open-label study of cannabidiol (CBD) for treatment-resistant epilepsy                                                                                          | To compare QOL at baseline and after 1 year of treatment with CBD.                                                                                                                                                                                                                                                                                                                                                                                                                                                                                  | Epilepsy and Behavior                      |
| Palmieri et al., 2019              | Italy          | Spontaneous, anecdotal, retrospective, open-label study on the efficacy, safety and tolerability of cannabis galenical preparation (Bedrocan)                                                            | To investigate the short-term therapeutic effects, safety/tolerability and potential side effects of the cannabis galenical preparation (Bedrocan) in patients with a range of chronic conditions unresponsive to other treatments.                                                                                                                                                                                                                                                                                                                 | International Journal of Pharmacy Practice |
| Ueberall et al., 2019              | Germany        | Effectiveness and tolerability of THC:CBD oromucosal spray as add-on measure in patients with severe chronic pain: Analysis of 12-week open-label real-world data provided by the German pain e-registry | To assess 1)analgesic effects by using a composite responder definition that incorporates response- and relief-rates of a combination of nine different patient-reported/relevant parameters (such as pain intensity, pain-related disabilities with respect to daily life activities, sleep, overall well-being, physical and mental quality-of-life, depression, anxiety and stress),and 2) to evaluate prevalence and spectrum of treatment-emergent adverse events in response to MC as add-on treatment to pre-existing analgesic medications. | Journal of Pain Research                   |
| Markova et al., 2019               | Czech Republic | Sativex as add-on therapy vs. further optimized first-line ANTispastics (SAVANT) in resistant multiple sclerosis spasticity: a double-blind, placebo-controlled randomised clinical trial                | To evaluate the efficacy of MC oromucosal spray (Sativex) as add-on therapy to optimised standard antispasticity treatment in patients with moderate to severe MS spasticity.                                                                                                                                                                                                                                                                                                                                                                       | International Journal of Neuroscience      |

| <b>1<sup>st</sup> Author, year</b> | <b>Country</b> | <b>Title</b>                                                                                                                                                         | <b>Study Aims</b>                                                                                                                                                                                            | <b>Journal</b>                                           |
|------------------------------------|----------------|----------------------------------------------------------------------------------------------------------------------------------------------------------------------|--------------------------------------------------------------------------------------------------------------------------------------------------------------------------------------------------------------|----------------------------------------------------------|
| Irving et al., 2018                | United Kingdom | A Randomized, Double-blind, Placebo-controlled, Parallel-group, Pilot Study of Cannabidiol-rich Botanical Extract in the Symptomatic Treatment of Ulcerative Colitis | To investigate the efficacy and safety of MC, CBD-rich botanical extract treatment, in patients with mild to moderate Ulcerative Colitis which had proved refractory to 5-ASA therapy.                       | Inflammatory Bowel Diseases                              |
| Gruber et al., 2016                | United States  | Splendor in the grass? A pilot study assessing the impact of medical marijuana on executive function                                                                 | To assess the impact of 3 months of MC treatment on executive function, exploring whether MC patients would experience improvement in cognitive functioning, perhaps related to primary symptom alleviation. | Frontiers in Pharmacology                                |
| Haroutounian et al., 2016          | Israel         | The Effect of Medicinal Cannabis on Pain and Quality-of-Life Outcomes in Chronic Pain: A Prospective Open-label Study                                                | To determine the long-term effect of MC treatment on pain and functional outcomes in participants with treatment-resistant chronic pain.                                                                     | Clinical Journal of Pain                                 |
| Haupts et al., 2016                | Germany        | Influence of Previous Failed Antispasticity Therapy on the Efficacy and Tolerability of THC:CBD Oromucosal Spray for Multiple Sclerosis Spasticity                   | To determine whether antispasticity treatment history influenced the efficacy and safety of add-on MC oromucosal spray in MS spasticity patients.                                                            | European Neurology                                       |
| Russo et al., 2016                 | Italy          | Should we care about sativex-induced neurobehavioral effects? A 6-month follow-up study                                                                              | To characterize effects of 1- and 6-month Sativex administration in cannabis-naive MS patients including neurobehavioral function, tolerability, possible abuse, and effects on QoL and motor functions.     | European Review for Medical and Pharmacological Sciences |
| Russo et al., 2016                 | Italy          | Evaluating Sativex R in Neuropathic Pain Management: A Clinical and Neurophysiological Assessment in Multiple Sclerosis                                              | To investigate the role of Sativex in improving pain in MSs patients.                                                                                                                                        | Pain Medicine                                            |
| Vermersch et al., 2016             | Italy          | Tetrahydrocannabinol: Cannabidiol oromucosal spray for multiple sclerosis-related resistant spasticity in daily practice                                             | To collect data from everyday clinical practice concerning the effectiveness and tolerability of MC.                                                                                                         | European Neurology                                       |
| Ware et al., 2015                  | Canada         | Cannabis for the Management of Pain: Assessment of Safety Study (COMPASS)                                                                                            | To evaluate safety issues in patients with chronic pain using cannabis as part of their pain management regimen.                                                                                             | Journal of Pain                                          |

CBD, cannabidiol; GAD, generalised anxiety disorder; HRQL, Health-related quality of life; IBD, inflammatory bowel disease; MC, Medicinal Cannabis; MS, Multiple Sclerosis; PROM, patient reported outcome measure; PTSD, Post-Traumatic Stress Disorder; QOL, Quality of Life; RCT randomised controlled trial; THC, tetrahydrocannabinol; UKMCR, UK Medical Cannabis Registry
