# Supplementary material for: Health-related quality of life in patients receiving medicinal cannabis: systematic review and meta-analysis of primary research findings 2015–2025
Source: Springer Nature journal article supplement (doi:10.1007/s11136-026-04170-7), 2026-02-01
Supplement: MOESM4 [file 11136_2026_4170_MOESM4_ESM.pdf]

**Health-related quality of life in patients receiving medicinal cannabis: Systematic review and meta-analysis of primary research findings 2015 – 2025**

*Quality of Life Research*

\*Margaret-Ann Tait,<sup>1,2,3</sup> Louise Acret,<sup>1,2,3</sup> Daniel SJ Costa,<sup>4</sup> Kate White,<sup>1,2,3</sup> Rachel Campbell,<sup>4</sup> Claudia Rutherford<sup>1,2,3</sup>

<sup>1</sup>Susan Wakil School of Nursing, Faculty of Medicine and Health, University of Sydney, NSW, Australia

<sup>2</sup>Sydney Local Health District, NSW, Australia

<sup>3</sup>The Daffodil Centre, The University of Sydney, and Cancer Council NSW

<sup>4</sup>School of Psychology, Faculty of Science, University of Sydney, NSW, Australia

\* [margaret-ann.tait@sydney.edu.au](mailto:margaret-ann.tait@sydney.edu.au)

**Online Resource 4: Health conditions of participants treated with Medicinal Cannabis (MC) in included studies.**

|    | <b>Health conditions of participants treated with MC</b> | <b>Number of studies recruiting participants with health condition</b> |
|----|----------------------------------------------------------|------------------------------------------------------------------------|
| 1  | Agoraphobia                                              | 3                                                                      |
| 2  | Alcohol use disorder                                     | 1                                                                      |
| 3  | Alzheimer syndrome                                       | 3                                                                      |
| 4  | Amyotrophic lateral sclerosis                            | 1                                                                      |
| 5  | Anorexia and wasting                                     | 6                                                                      |
| 6  | Anxiety disorder                                         | 16                                                                     |
| 7  | Arthritis / Osteoarthritis                               | 7                                                                      |
| 8  | Attention deficit / hyperactivity disorder               | 6                                                                      |
| 9  | Autism                                                   | 6                                                                      |
| 10 | Back pain                                                | 4                                                                      |
| 11 | Behavioral disorder                                      | 2                                                                      |
| 12 | Benzodiazepine dependence                                | 2                                                                      |
| 13 | Bipolar disorder                                         | 2                                                                      |
| 14 | Brain injury                                             | 2                                                                      |
| 15 | Cancer symptoms                                          | 16                                                                     |
| 16 | Cardiovascular disease                                   | 1                                                                      |
| 17 | Chemotherapy-induced nausea and vomiting                 | 5                                                                      |
| 18 | Chronic fatigue                                          | 2                                                                      |
| 19 | Chronic gum disease                                      | 1                                                                      |
| 20 | Chronic kidney disease                                   | 2                                                                      |
| 21 | Chronic neuropathic pain                                 | 9                                                                      |
| 22 | Chronic pain                                             | 24                                                                     |
| 23 | Complex regional pain syndrome                           | 6                                                                      |
| 24 | Congenital Adrenal Hyperplasia                           | 1                                                                      |
| 25 | Dementia                                                 | 2                                                                      |
| 26 | Depression                                               | 11                                                                     |
| 27 | Diabetes                                                 | 2                                                                      |
| 28 | Dyslipidemia                                             | 1                                                                      |
| 29 | Dysmenorrhea                                             | 1                                                                      |
| 30 | Dystonia                                                 | 2                                                                      |
| 31 | Eating disorder                                          | 3                                                                      |
| 32 | Ehlers-Danlos                                            | 3                                                                      |
| 33 | Endometriosis                                            | 2                                                                      |
| 34 | Epilepsy                                                 | 13                                                                     |
| 35 | Fibromyalgia                                             | 8                                                                      |
| 36 | Gastrointestinal disorder                                | 3                                                                      |
| 37 | Glaucoma / intraocular eye pressure                      | 4                                                                      |
| 38 | Hashimoto's thyroiditis                                  | 1                                                                      |
| 39 | Hereditary spastic paraplegia                            | 2                                                                      |
| 40 | HIV                                                      | 2                                                                      |
| 41 | Hypertension                                             | 2                                                                      |

|    |                                                                     |    |
|----|---------------------------------------------------------------------|----|
| 42 | Inflammatory Bowel Disease (ulcerative colitis and Crohn's disease) | 14 |
| 43 | Irritable bladder syndrome                                          | 1  |
| 44 | Irritable bowel syndrome                                            | 3  |
| 45 | Memory loss                                                         | 1  |
| 46 | Migraine/headache                                                   | 11 |
| 47 | Motor neuron disease                                                | 2  |
| 48 | Movement disorder                                                   | 1  |
| 49 | Multiple Sclerosis                                                  | 15 |
| 50 | Multiple system atrophy                                             | 1  |
| 51 | Narcolepsy                                                          | 1  |
| 52 | Nystagmus                                                           | 1  |
| 53 | Obsessive compulsive disorder                                       | 5  |
| 54 | Opioid use disorder                                                 | 2  |
| 55 | Osteomyelitis                                                       | 1  |
| 56 | Palliative Care                                                     | 3  |
| 57 | Panic disorder                                                      | 3  |
| 58 | Parkinson disease                                                   | 7  |
| 59 | Perimenopause                                                       | 1  |
| 60 | Polymyalgia rheumatica                                              | 1  |
| 61 | Posttraumatic stress disorder                                       | 12 |
| 62 | Premenstrual dysphoric disorder                                     | 1  |
| 63 | Psychiatric disorders                                               | 1  |
| 64 | Refractory nausea and vomiting                                      | 6  |
| 65 | Restless legs syndrome                                              | 1  |
| 66 | Severe eczema                                                       | 1  |
| 67 | Sleep disorder / insomnia                                           | 12 |
| 68 | Spasticity                                                          | 4  |
| 69 | Stress                                                              | 1  |
| 70 | Stroke                                                              | 2  |
| 71 | Substance use disorder                                              | 1  |
| 72 | Tic disorder                                                        | 2  |
| 73 | Tinnitus                                                            | 2  |
| 74 | Topical steroid withdrawal syndrome                                 | 1  |
| 75 | Tourette syndrome                                                   | 3  |
| 76 | Tremors                                                             | 6  |
| 77 | Vaginismus                                                          | 1  |

---
