# Supplementary material for: Health-related quality of life in patients receiving medicinal cannabis: systematic review and meta-analysis of primary research findings 2015–2025
Source: Springer Nature journal article supplement (doi:10.1007/s11136-026-04170-7), 2026-02-01

# Health-related quality of life in patients receiving medicinal cannabis: Systematic review and meta-analysis of primary research findings 2015 – 2025

Quality of Life Research

\*Margaret-Ann Tait,<sup>1,2,3</sup> Louise Acret,<sup>1,2,3</sup> Daniel SJ Costa,<sup>4</sup> Kate White,<sup>1,2,3</sup> Rachel Campbell,<sup>4</sup> Claudia Rutherford<sup>1,2,3</sup>

<sup>1</sup>Susan Wakil School of Nursing, Faculty of Medicine and Health, University of Sydney, NSW, Australia

<sup>2</sup>Sydney Local Health District, NSW, Australia

<sup>3</sup>The Daffodil Centre, The University of Sydney, a joint venture with Cancer Council NSW

<sup>4</sup>School of Psychology, Faculty of Science, University of Sydney, NSW, Australia

\* [margaret-ann.tait@sydney.edu.au](mailto:margaret-ann.tait@sydney.edu.au)

**Online Resource 5:** Completeness of PRO reporting for included studies assessed with the revised PRO checklist (combining STROBE/CONSORT-PRO checklists). Ratings displayed as % of total criteria met.

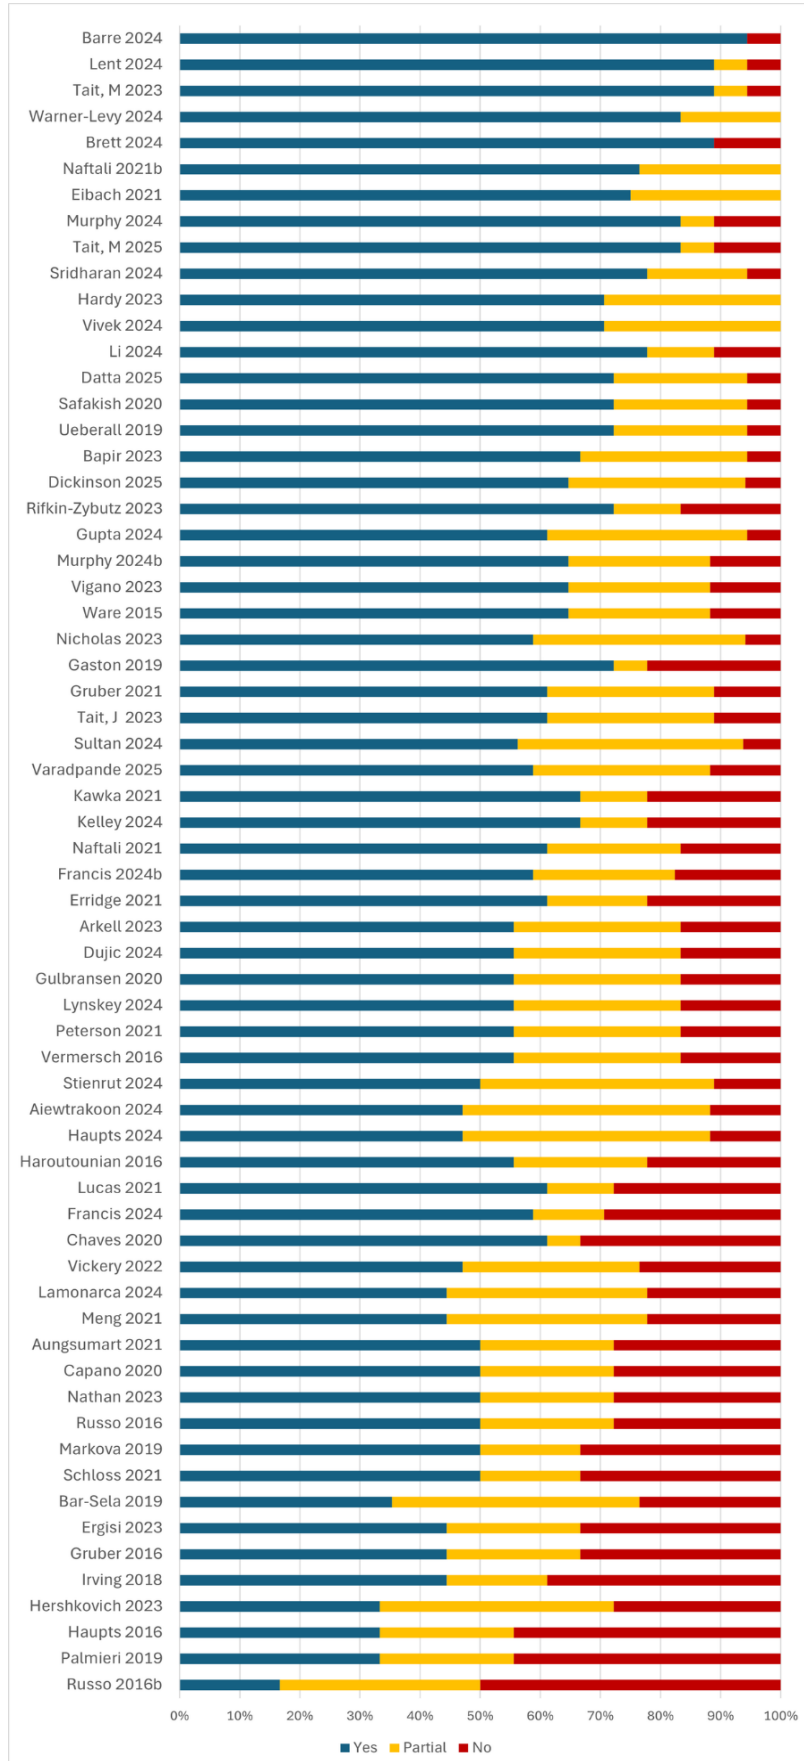

Supplement: MOESM5 [file 11136_2026_4170_MOESM5_ESM.pdf]
