# Supplementary material for: Health-related quality of life in patients receiving medicinal cannabis: systematic review and meta-analysis of primary research findings 2015–2025
Source: Springer Nature journal article supplement (doi:10.1007/s11136-026-04170-7), 2026-02-01
Supplement: MOESM6 [file 11136_2026_4170_MOESM6_ESM.pdf]

**Health-related quality of life in patients receiving medicinal cannabis: Systematic review and meta-analysis of primary research findings 2015 – 2025**

*Quality of Life Research*

\*Margaret-Ann Tait,<sup>1,2,3</sup> Louise Acret,<sup>1,2,3</sup> Daniel SJ Costa,<sup>4</sup> Kate White,<sup>1,2,3</sup> Rachel Campbell,<sup>4</sup> Claudia Rutherford<sup>1,2,3</sup>

<sup>1</sup>Susan Wakil School of Nursing, Faculty of Medicine and Health, University of Sydney, NSW, Australia

<sup>2</sup>Sydney Local Health District, NSW, Australia

<sup>3</sup>The Daffodil Centre, The University of Sydney, a joint venture with Cancer Council NSW

<sup>4</sup>School of Psychology, Faculty of Science, University of Sydney, NSW, Australia

\* [margaret-ann.tait@sydney.edu.au](mailto:margaret-ann.tait@sydney.edu.au)

**Online Resource 6:** Judgement on risk of bias (RoB 2) items for each included randomised controlled trial included in meta-analysis (n=8).

|               | Randomisation process | Deviations from intended interventions | Missing outcome data | Outcome measurement | Selection of reported result | Overall risk-of-bias judgement |
|---------------|-----------------------|----------------------------------------|----------------------|---------------------|------------------------------|--------------------------------|
| Barre 2024    | -                     | -                                      | +                    | +                   | -                            | -                              |
| Chaves 2020   | +                     | +                                      | +                    | +                   | -                            | -                              |
| Dujic 2024    | -                     | -                                      | -                    | +                   | +                            | -                              |
| Hardy 2023    | +                     | +                                      | +                    | +                   | +                            | +                              |
| Haupts 2016   | -                     | +                                      | +                    | +                   | +                            | -                              |
| Irving 2018   | +                     | +                                      | +                    | +                   | +                            | +                              |
| Naftali 2021  | +                     | -                                      | +                    | +                   | -                            | -                              |
| Naftali 2021b | +                     | +                                      | +                    | +                   | -                            | -                              |

  

|                                                                                     |               |
|-------------------------------------------------------------------------------------|---------------|
|  | Low           |
|  | Some concerns |
|  | High          |
